# Supplementary material for: Newly designed manganese and cobalt complexes with pendant amines for the hydrogenation of CO2 to methanol: a DFT study
Source: Royal Society of Chemistry journal article supplement (doi:10.1039/c6cy01551d), 2016-10-28
Supplement: c6cy01551d2.pdf [file c6cy01551d2.pdf]

## Supporting Information

### Newly designed manganese and cobalt complexes with pendant amines for the hydrogenation of CO<sub>2</sub> to methanol: a DFT study

Xiangyang Chen,<sup>a, b</sup> Hongyu Ge,<sup>a, b</sup> and Xinzheng Yang<sup>\*a</sup>

<sup>a</sup>Beijing National Laboratory for Molecular Sciences, State Key Laboratory for Structural Chemistry of Unstable and Stable Species, Institute of Chemistry, Chinese Academy of Sciences, Beijing 100190, People's Republic of China

<sup>b</sup>University of Chinese Academy of Sciences, Beijing 100049, People's Republic of China

E-mail: [xyang@iccas.ac.cn](mailto:xyang@iccas.ac.cn)

#### Evaluation of density functionals

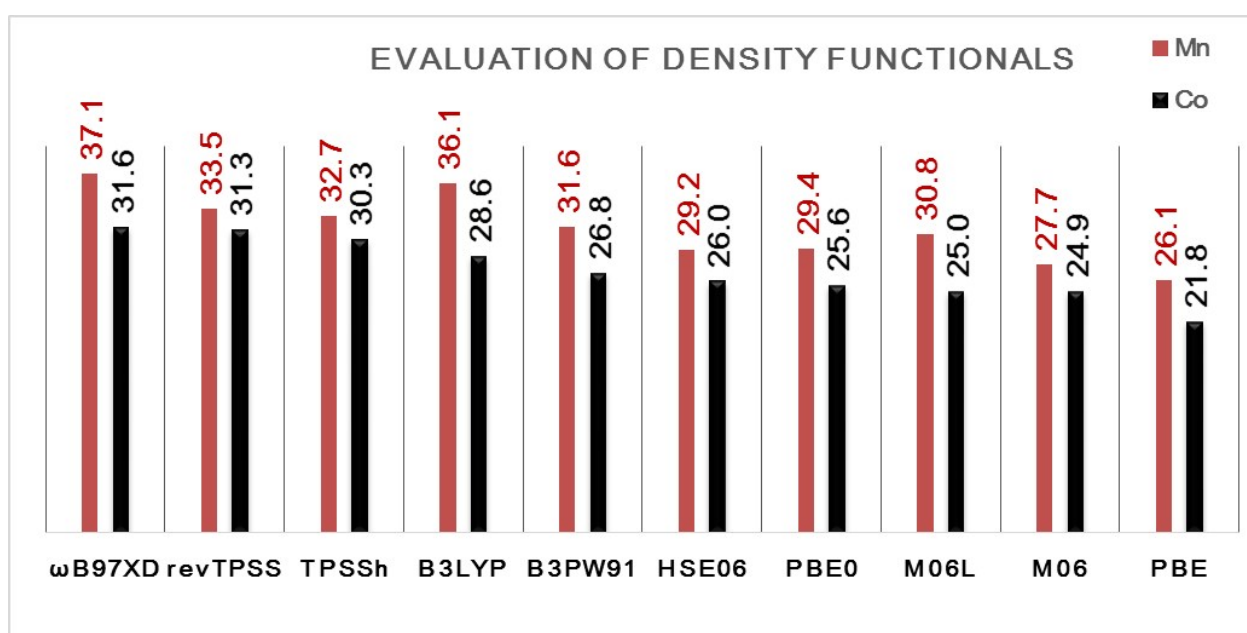

**Figure S1.** Relative electronic energies of different density functionals for the rate-determining states of the reactions catalyzed by **1**<sub>Mn-COOH</sub> (**4'**<sub>Mn</sub> → **TS**<sub>3,7-Mn</sub>, red) and **1**<sub>Co-COOH</sub> (**4'**<sub>Co</sub> → **7**<sub>Co</sub>, black).

To examine the effect of different density functionals on the calculated energy barriers in this transition metal system, we selected nine other well-known or recently developed density functionals,<sup>1</sup> including pure density functionals M06L,<sup>2, 3</sup> PBE,<sup>4</sup> revTPSS,<sup>5</sup> and hybrid density functionals PBE0, TPSSh,<sup>5</sup> B3LYP,<sup>6, 7</sup> B3PW91,<sup>8</sup> HSE06,<sup>9, 10</sup> and ωB97XD,<sup>11, 12</sup> to calculate the relative electronic energies of the rate-determining states (**4'**<sub>Mn</sub> → **TS**<sub>3,7-Mn</sub> and **4'**<sub>Co</sub> → **7**<sub>Co</sub>) using the same basis set at M06 optimized structures.

As shown in Figure S1, the difference of relative electronic energies of these 10 density functionals is less than 11 kcal/mol, which indicates a moderate dependence of density functionals of these manganese and cobalt systems. The M06 results are very close to the B3PW91, HSE06, PBE0, and M06L results. Therefore, M06 is a suitable functional for the study of these cobalt and manganese systems.

## REFERENCES

1. S. F. Sousa, P. A. Fernandes and M. J. Ramos, *J. Phys. Chem. A*, 2007, **111**, 10439-10452.
2. Y. Zhao and D. G. Truhlar, *Theor. Chem. Acc.*, 2008, **119**, 525-525.
3. Y. Zhao and D. G. Truhlar, *Theor. Chem. Acc.*, 2008, **120**, 215-241.
4. J. P. Perdew, K. Burke and M. Ernzerhof, *Phys. Rev. Lett.*, 1997, **78**, 1396-1396.
5. J. Tao, J. P. Perdew, V. N. Staroverov and G. E. Scuseria, *Phys. Rev. Lett.*, 2003, **91**, 146401.
6. A. D. Becke, *J. Chem. Phys.*, 1993, **98**, 5648-5652.
7. C. Lee, W. Yang and R. G. Parr, *Phys. Rev. B*, 1988, **37**, 785-789.
8. J. P. Perdew, J. A. Chevary, S. H. Vosko, K. A. Jackson, M. R. Pederson, D. J. Singh and C. Fiolhais, *Phys. Rev. B*, 1992, **46**, 6671-6687.
9. A. V. Krukau, O. A. Vydrov, A. F. Izmaylov and G. E. Scuseria, *J. Chem. Phys.*, 2006, **125**, 224106.
10. T. M. Henderson, A. F. Izmaylov, G. Scalmani and G. E. Scuseria, *J. Chem. Phys.*, 2009, **131**, 044108.
11. A. D. Becke, *J. Chem. Phys.*, 1997, **107**, 8554-8560.
12. Q. Wu and W. Yang, *J. Chem. Phys.*, 2002, **116**, 515-524.
